# Supplementary material
Source: PubMed Central journal article supplement (PMC3024780)
Supplement: supp_M110.125526_jbc.M110.125526-1.pdf [file supp_M110.125526_jbc.M110.125526-1.pdf]

SUPPLEMENTARY DATA

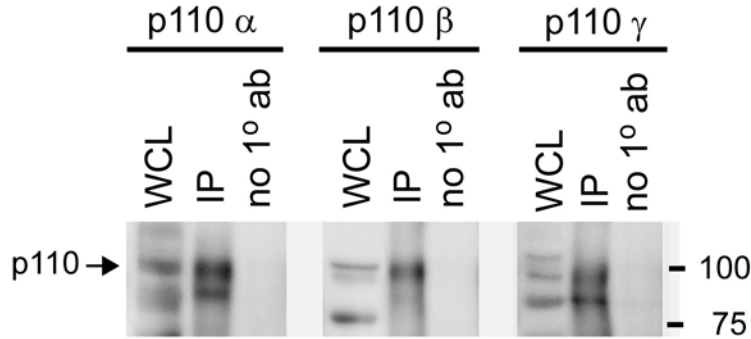

Fig. S1. PI3K subunits p110 $\alpha$ ,  $\beta$  and  $\gamma$  were immunoprecipitated from guinea pig ventricular myocyte lysates using isoform-specific antibodies and subjected to Western blot analysis. Shown are whole cell lysates (WCL), corresponding immunoprecipitates (IP) and negative controls with no primary antibody added (no 1 $^{\circ}$  ab). P110 immunocomplexes immobilized on protein-G beads were used for isoform-specific measurement of cardiac phosphoinositol 3-kinase activity as described.

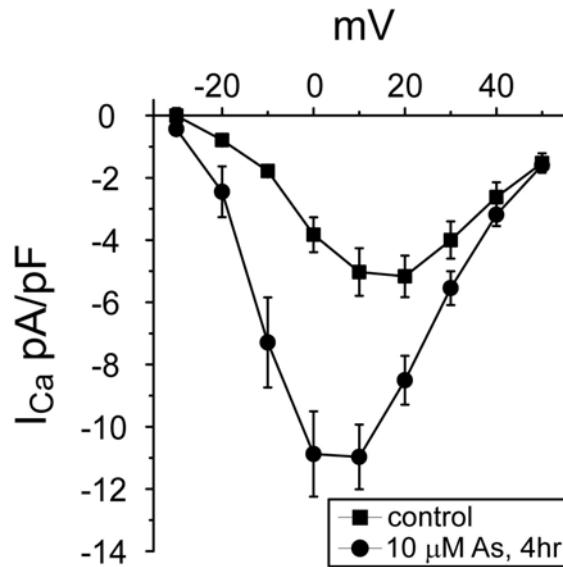

Fig. S2.  $As_2O_3$  increases cardiac calcium currents on short-term incubation. Calcium current traces were elicited as described in Fig.1. Shown are averaged I-V relationships measured under control conditions and following a 4hr incubation with 10 $\mu$ M  $As_2O_3$  (n=5-6).

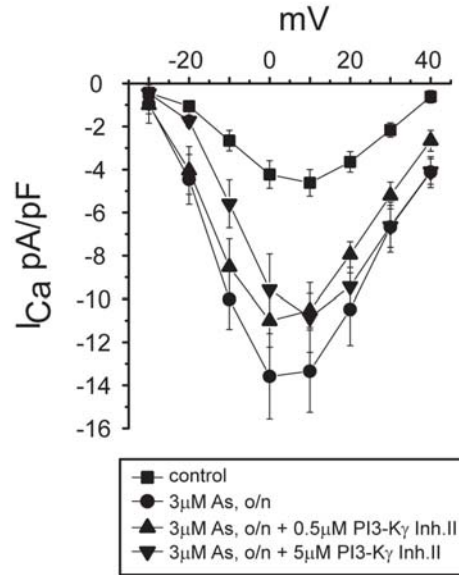

Fig. S3. As<sub>2</sub>O<sub>3</sub>-induced increases in cardiac calcium currents are not blocked by PI3-K $\gamma$  Inhibitor II. Calcium current traces were elicited as described in Fig.1. Shown are averaged I-V relationships measured under control conditions, following overnight incubation with 3 $\mu$ M As<sub>2</sub>O<sub>3</sub>, and following a 90 min incubation with either 0.5 or 5 $\mu$ M PI3-K $\gamma$  Inhibitor II in myocytes pretreated overnight with 3 $\mu$ M As<sub>2</sub>O<sub>3</sub> (n=5-7).

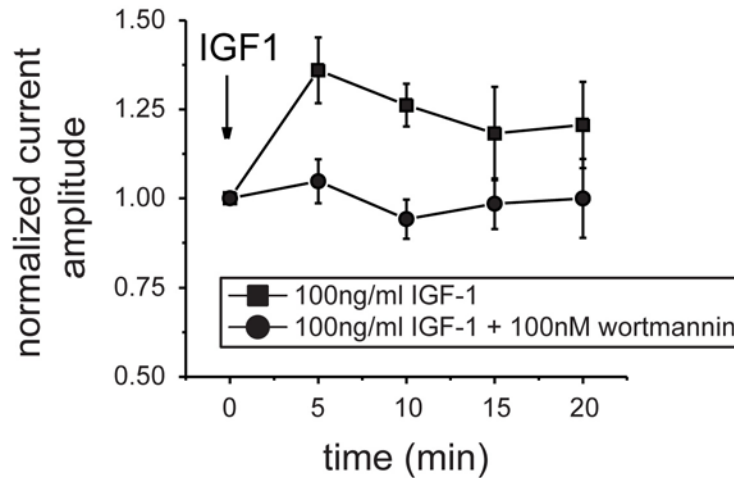

Fig. S4. Acute application of 100ng/ml IGF-1 increases cardiac calcium currents in freshly isolated guinea pig ventricular myocytes. Shown are normalized current densities elicited with a depolarizing test pulse to +10 mV (HP= -40mV). Recordings were performed in the perforated patch configuration. IGF-1 induced current increases are blocked by 100 nM wortmannin (n=3-4).

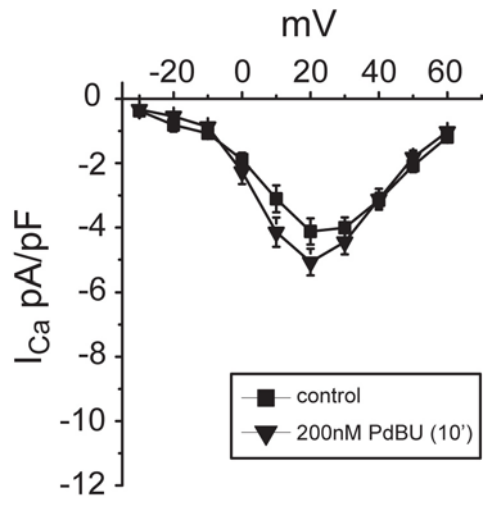

Fig. S5. Effects of phorbol ester PdBU on cardiac calcium currents. Shown are averaged I-V relationships recorded under control conditions or following acute application of 200nM PdBU. I-V relationships in the presence of PdBU were recorded 10 min after start of drug application (n=5-11).

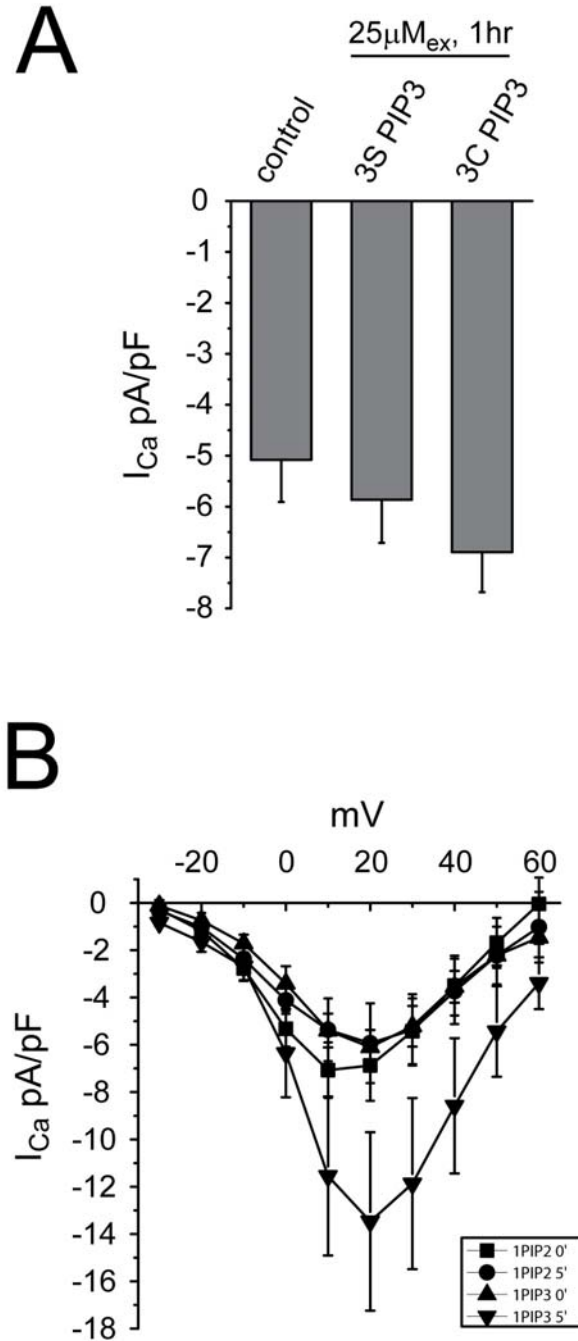

Fig. S6. PIP3 effects on cardiac calcium currents. A, maximal calcium current densities measured in cardiomyocytes using perforated patch recordings under control conditions or following a 1 hr pre-incubation with  $25\mu\text{M}$  of the metabolically stabilized PIP3 derivatives 3S- and 3C-PIP3 ( $n=6$ ). B, shown are averaged I-V-relationships measured in cardiomyocytes on internal perfusion with either  $1\mu\text{M}$  C8-PIP3 or C8-PIP2 following overnight incubation with  $1\mu\text{M}$   $\text{As}_2\text{O}_3$ . I-V relationships were recorded immediately ( $0'$ ) or 5min ( $5'$ ) after gaining whole cell access ( $n=5$ ).

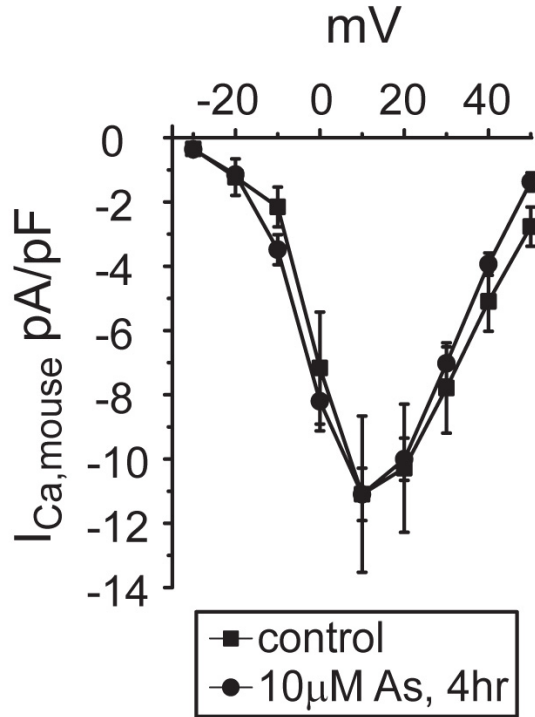

Fig. S7.  $\text{As}_2\text{O}_3$  does not increase cardiac L-type calcium currents in mouse ventricular myocytes on short-term incubation. In mouse cardiomyocytes it has been shown that muscle-specific knock-out of PTEN results in a modest increase in calcium current density of about 30-35%. Given that we report oxidation of only about 30% of total PTEN on exposure to  $\text{As}_2\text{O}_3$ , we reasoned that in wildtype mice changes of L-type calcium currents should be very small (in the range of about 10%) on exposure to  $\text{As}_2\text{O}_3$ . To test this hypothesis we exposed 'wildtype' mouse ventricular myocytes for 4hr to 10  $\mu\text{M}$   $\text{As}_2\text{O}_3$ . In these experiments calcium current traces were elicited using 300ms step depolarizations in increments of 10mV from -30 to + 50mV (hp - 40mV) under control conditions or in the presence of  $\text{As}_2\text{O}_3$  (protocol is identical to the one used in guinea pig experiments). Depicted are averaged I-V relationships measured under control conditions and following 4hr drug exposure (n=7). As can be seen from IV-relationships, in mouse myocytes calcium current densities were not increased on incubation with  $\text{As}_2\text{O}_3$ . Here, it is also important to note, that calcium current densities in mouse myocytes measured under control conditions are significantly larger than corresponding current densities measured in guinea pig ventricular myocytes (-11pA/pF versus -4.6pA/pF).
